# Supplementary material for: Interface engineering with self-assembling Au@Ag@β-cyclodextrin bimetal nanoparticles to fabricate a ring-like arrayed SERS substrate for sensitive recognition of phthalate esters based on a host–guest interaction and the coffee ring effect
Source: Royal Society of Chemistry journal article supplement (doi:10.1039/d1ay01636a), 2021-12-17
Supplement: d1ay01636a1.pdf [file d1ay01636a1.pdf]

### Supplementary Information

#### Interface engineering with self-assembling Au@Ag@ $\beta$ -cyclodextrin bimetal nanoparticles to fabricate ring-like arrayed SERS substrate for sensitive recognition of phthalate esters based on host-guest interaction and the coffee ring effect

Jingfei Zhang, Yu Zhang and Guoyue Shi\*

School of Chemistry and Molecular Engineering, Shanghai Key Laboratory for Urban

Ecological Processes and Eco-Restoration, East China Normal University, 500

Dongchuan Road, Shanghai 200241, China

\*Authors to whom all correspondence should be addressed

Fax: + 021-54340043; Tel.: + 021-54340043

E-mail: gyshi@chem.ecnu.edu.cn

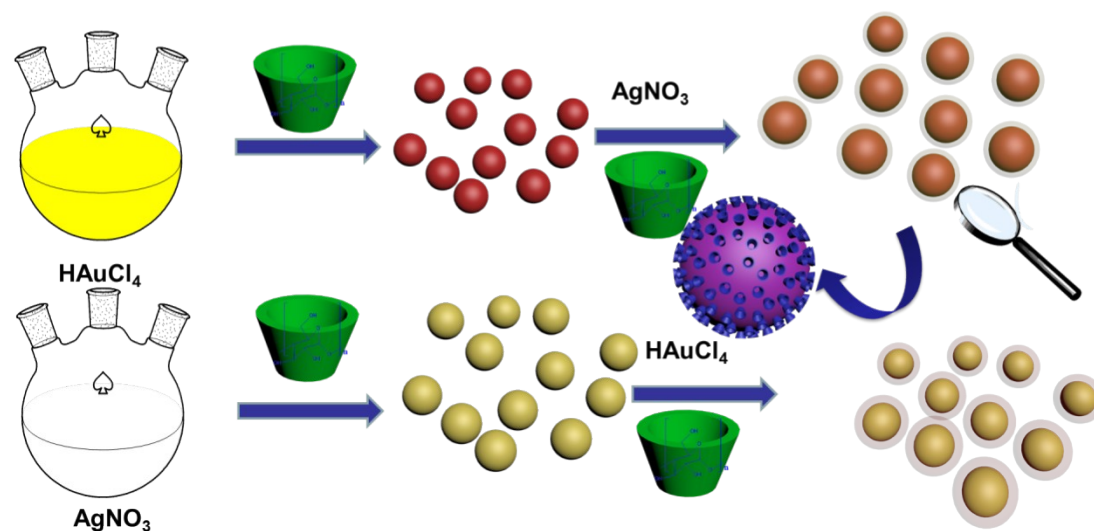

**Scheme S1** Schematic illustration of the synthesis of Au@Ag@ $\beta$ -CD and Ag@Au@ $\beta$ -CD core-shell nanoparticles.

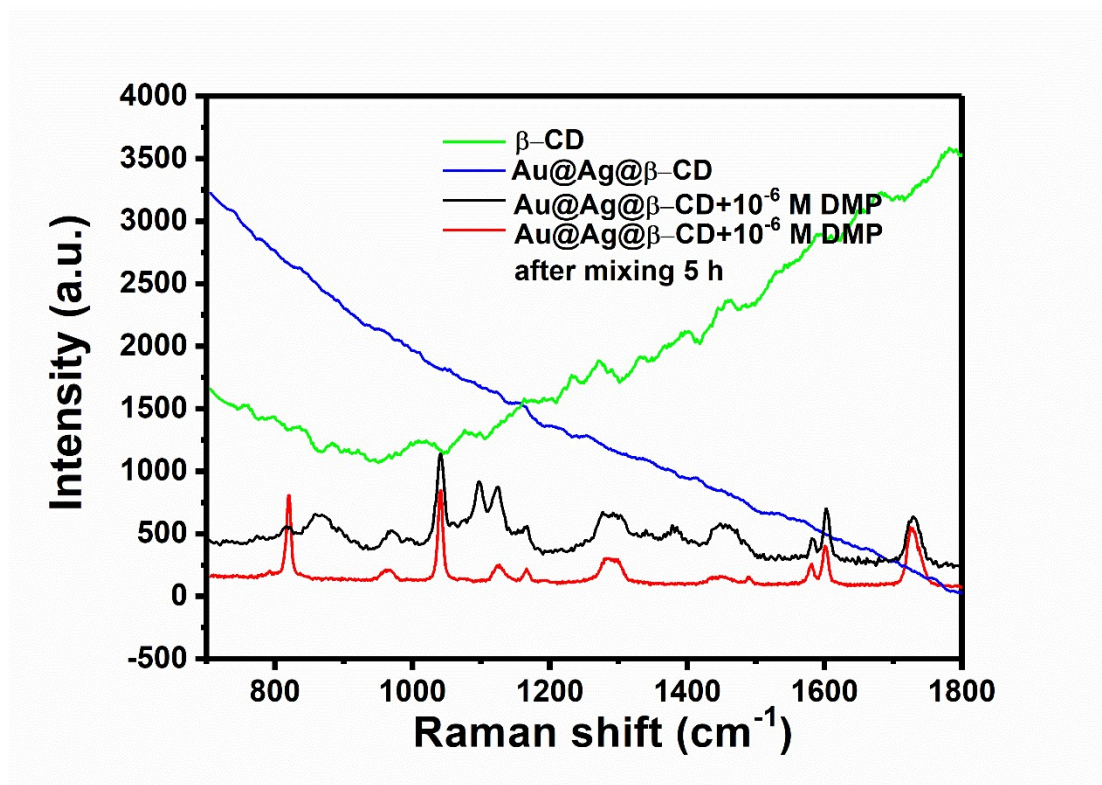

**Figure S1.** SERS spectra of  $\beta$ -CD, Au@Ag@ $\beta$ -CD, Au@Ag@ $\beta$ -CD- $10^{-6}$  M DMP and Au@Ag@ $\beta$ -CD- $10^{-6}$  M DMP after mixing 5 h.

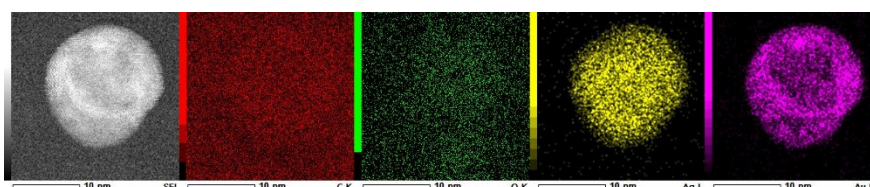

**Figure S2.** STEM-EDS elemental mapping images of Agcore@Aushell@ $\beta$ -CD

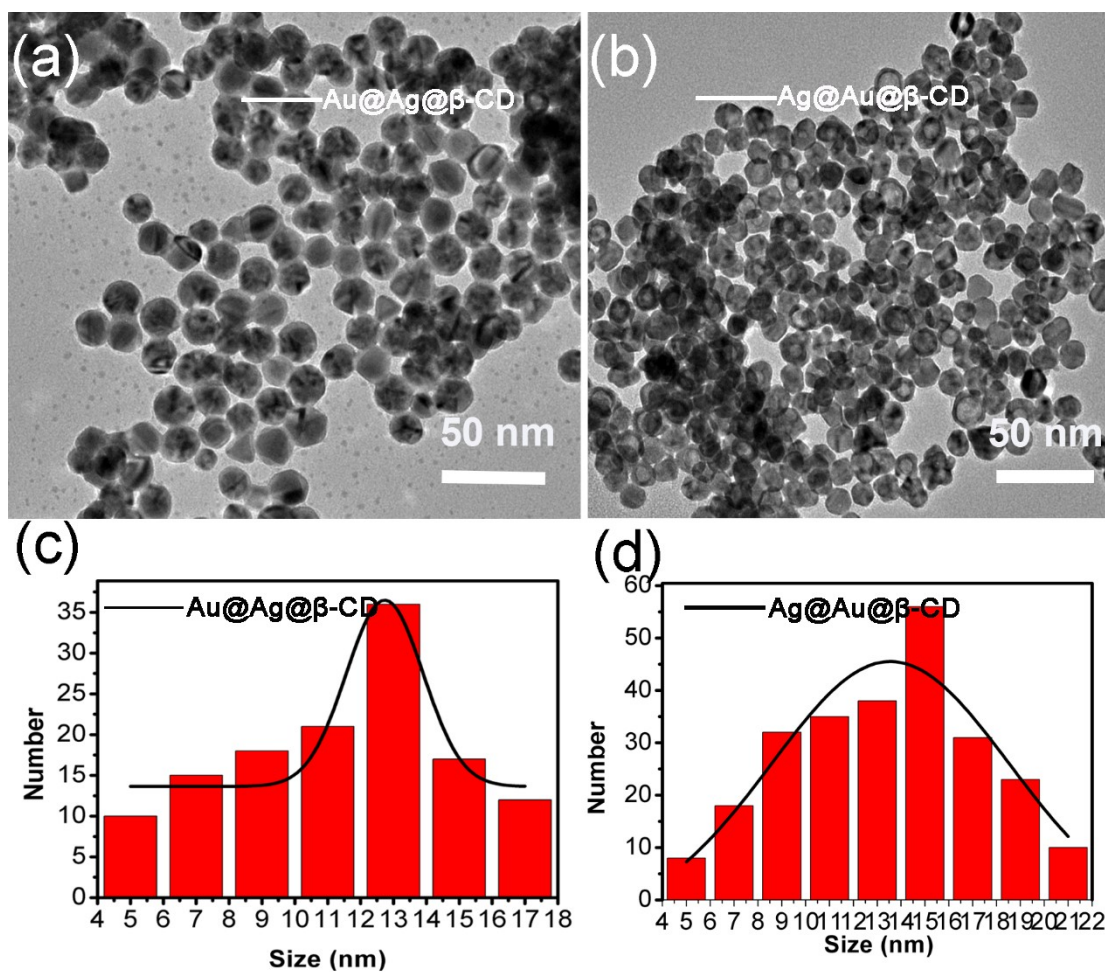

**Figure S3.** Low magnification TEM images of (a) Au@Ag@β-CD and (b) Ag@Au@β-CD core-shell nanoparticles; the corresponding particle size distribution curves of (c) Au@Ag@β-CD and (d) Ag@Au@β-CD core-shell nanoparticles.

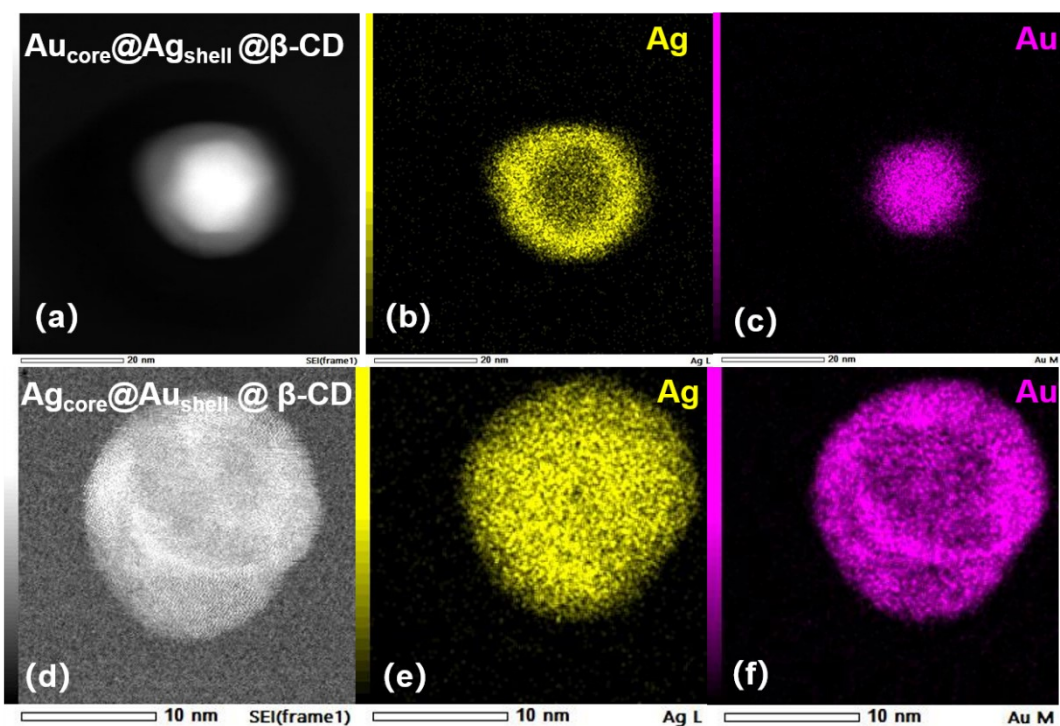

**Figure S4.** SEM-EDS elemental mapping images of (a-c) Au@Ag@β-CD and (d-f) Ag@Au@β-CD nanoparticles

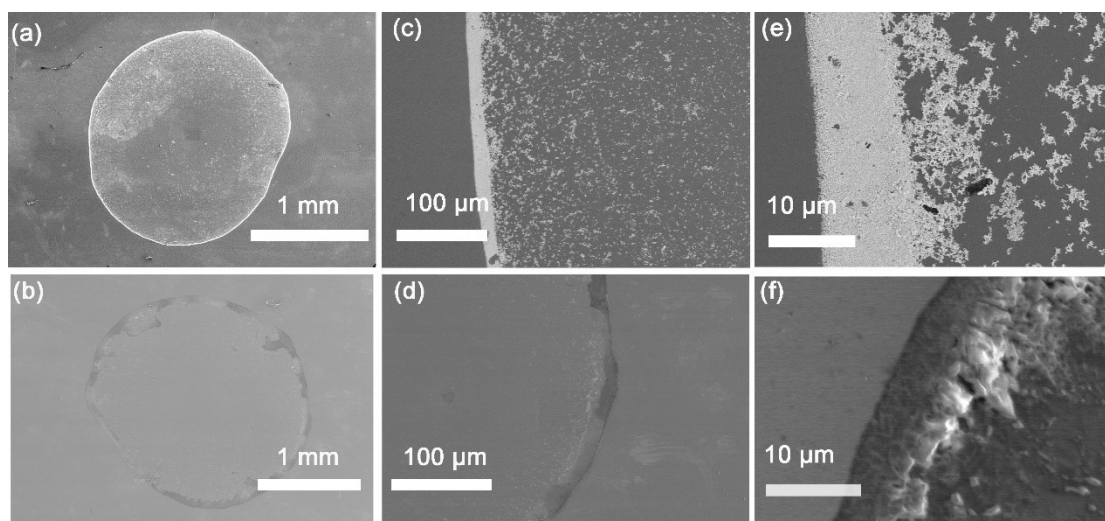

**Figure S5.** The gradually enlarged SEM images of the ring-like Ag@Au@β-CD SERS substrate (a, c, e) and the ring-like Au@Ag@β-CD SERS substrate (b, d, f).

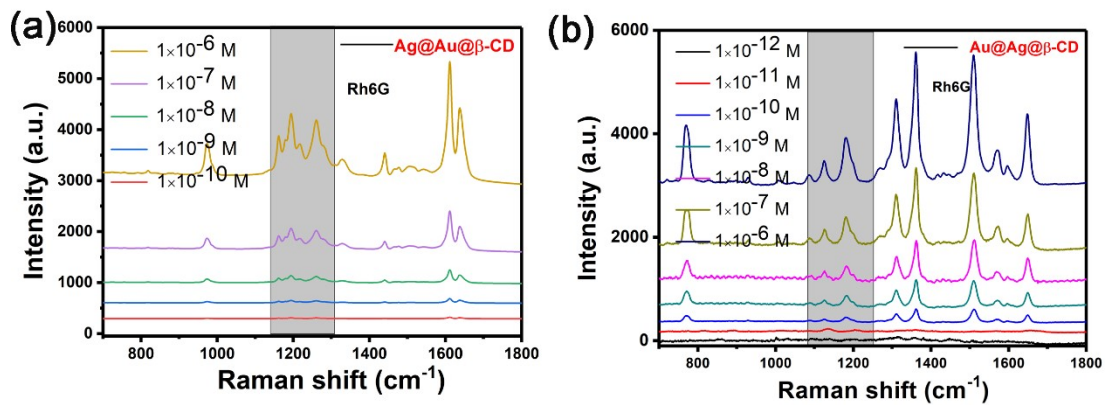

**Figure S6.** Concentration-dependent SERS spectra of (a) the ring-like Ag@Au@β-CD and (b) the ring-like Au@Ag@β-CD SERS substrates with various concentrations of Rh6G ( $1 \times 10^{-6}$  M,  $1 \times 10^{-7}$  M,  $1 \times 10^{-8}$  M,  $1 \times 10^{-9}$  M,  $1 \times 10^{-10}$  M,  $1 \times 10^{-11}$  M,  $1 \times 10^{-12}$  M).

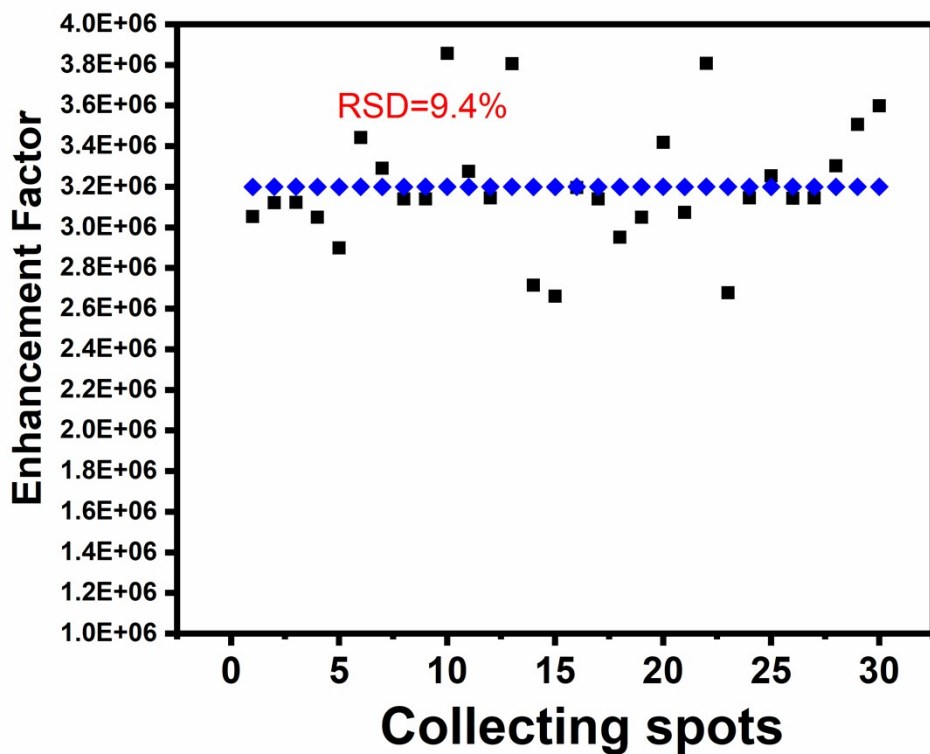

**Figure S7.** The standard deviation of EF of the ring-like Au@Ag@β-CD SERS substrate

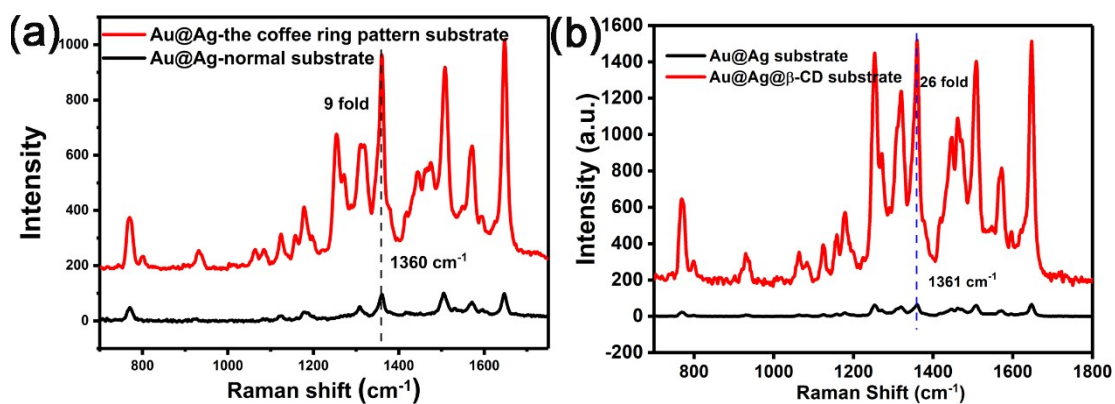

**Figure S8.** (a) Comparison of SERS intensity between ring-forming and non-ring-forming normal substrates with concentration of  $1 \times 10^{-8}$  M Rh6G. (b) Comparison of SERS intensity of the coffee ring substrates formed by modified  $\beta$ -CD and unmodified  $\beta$ -CD Au@Ag nanoparticles with concentration of  $1 \times 10^{-8}$  M Rh6G.

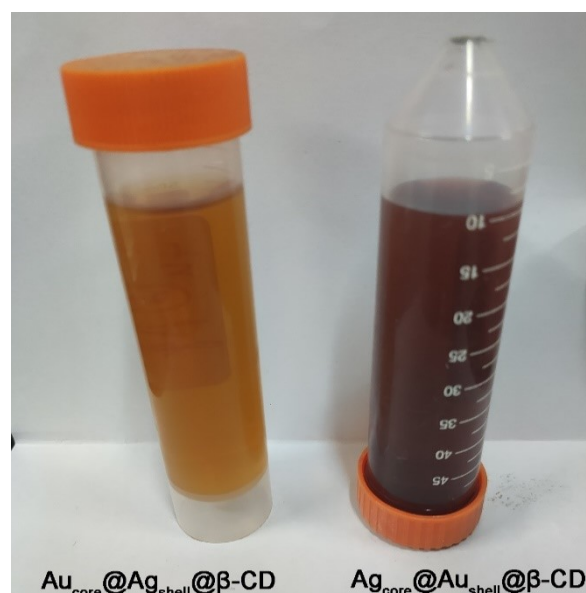

**Figure S9.** the photograph of Ag@Au@ $\beta$ -CD and Au@Ag@ $\beta$ -CD suspensions solution

Table S1. Detection of DOP in tap water and river water (n=5)

| Sample      | Added (nM) | Found (nM) | Recovery (%) | RSD (%) | (n=5) |
|-------------|------------|------------|--------------|---------|-------|
| tap water   | 5          | 4.76       | 95.2         | 5.32    |       |
|             | 20         | 21.32      | 106.6        | 5.62    |       |
|             | 50         | 48.56      | 94.1         | 4.79    |       |
| river water | 5          | 4.68       | 93.6         | 5.83    |       |
|             | 20         | 18.95      | 94.5         | 4.14    |       |
|             | 50         | 46.32      | 92.3         | 3.86    |       |

Table S2. Comparison of our proposed SERS method and previous reported SERS methods for the detection of PAEs

| SERS-active substance   | Test sample           | PAE         | Detection limit    | Recovery (%) | RSD (%)   | Refs     |
|-------------------------|-----------------------|-------------|--------------------|--------------|-----------|----------|
| SiO <sub>2</sub> @Au/Ag | Standard sample       | DOP<br>DBP  | 0.24 nM<br>0.22 nM | none         | none      | 1        |
| Au@Ag NCs               | Standard sample       | BBP<br>DEHP | 1.3 ng             | none         | none      | 2        |
| Au NPs                  | Standard sample       | DBP         | 1.3 μg             |              |           | 3        |
| AuNPs@β-CD              | Liquors and rice wine | BBP         | 14.9 nM            | 90~108       | 1.9~11.7  | 4        |
| Au NPs                  | Standard sample       | DOP         | 10 nM              |              |           | 5        |
| Au@Ag@β-CD NPs          | Tap and river water   | DOP         | 0.2 nM             | 92~106.6     | 3.86~5.62 | Our work |

**References:**

- 1.Chen J, Qin G, Shen W, et al. Fabrication of long-range ordered, broccoli-like SERS arrays and application in detecting endocrine disrupting chemicals[J]. Journal of Materials Chemistry C, 2015, 3(6): 1309-1318.
- 2.Hu X, Wang X, Ge Z, et al. Bimetallic plasmonic Au@ Ag nanocuboids for rapid and sensitive detection of Phthalate plasticizers with label-free Surface-enhanced Raman Spectroscopy[J]. Analyst, 2019.

3.Liu J, Li J, Li F, et al. Liquid–liquid interfacial self-assembled Au NP arrays for the rapid and sensitive detection of butyl benzyl phthalate (BBP) by surface-enhanced Raman spectroscopy[J]. *Analytical and bioanalytical chemistry*, 2018, 410(21): 5277-5285.

4.Li J, Hu X, Zhou Y, et al.  $\beta$ -Cyclodextrin-Stabilized Au Nanoparticles for the Detection of Butyl Benzyl Phthalate[J]. *ACS Applied Nano Materials*, 2019.

5.Wu Y, Yu W, Yang B, et al. Self-assembled two-dimensional gold nanoparticle film for sensitive nontargeted analysis of food additives with surface-enhanced Raman spectroscopy[J]. *Analyst*, 2018, 143(10): 2363-2368.
